# Supplementary material for: Biochemical Characterization and N-terminomics Analysis of Leukolysin, the Membrane-type 6 Matrix Metalloprotease (MMP25): CHEMOKINE AND VIMENTIN CLEAVAGES ENHANCE CELL MIGRATION AND MACROPHAGE PHAGOCYTIC ACTIVITIES
Source: PubMed Central journal article supplement — J Biol Chem. 2012 Feb 24;287(16):13382–95. doi: 10.1074/jbc.M111.314179 (PMC3339980; doi:10.1074/jbc.m111.314179), 2012-02-24
Supplement: supp_M111.314179_jbc.M111.314179-1.pdf [file supp_M111.314179_jbc.M111.314179-1.pdf]

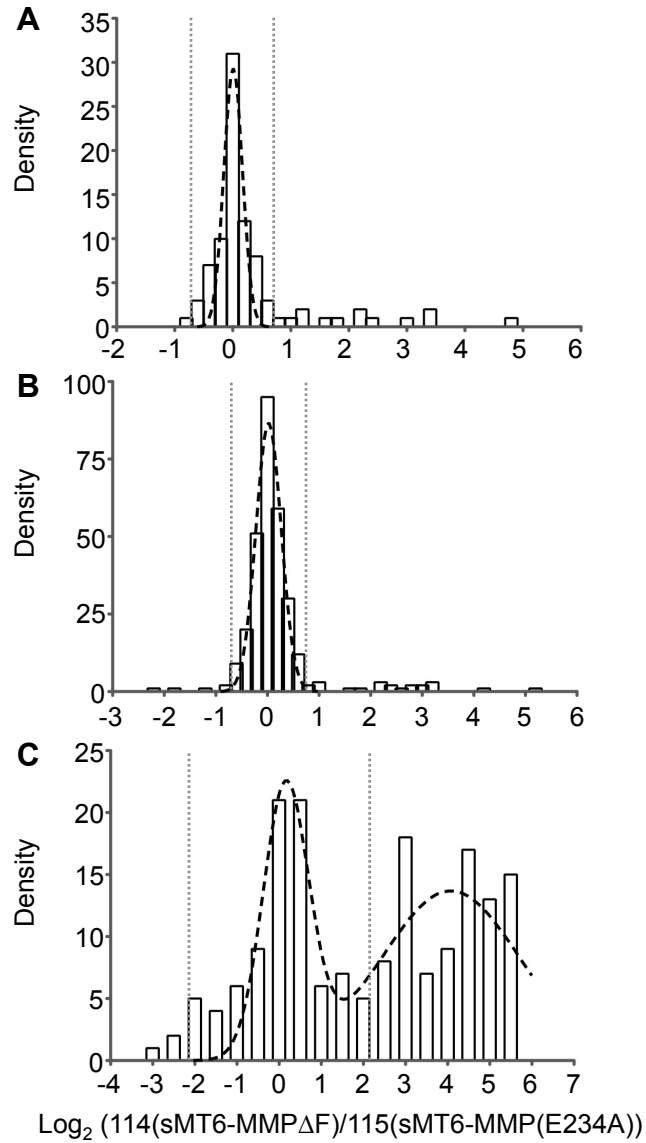**Fig S1. Distribution of peptides**

Histogram distribution of  $\text{log}_2(\text{iTRAQ ratio})$  of all normalized peptides (A) Exp1xExp2, (B) Exp1, (C) Exp2. Vertical lines indicate the cut-off ratio for each experiment.

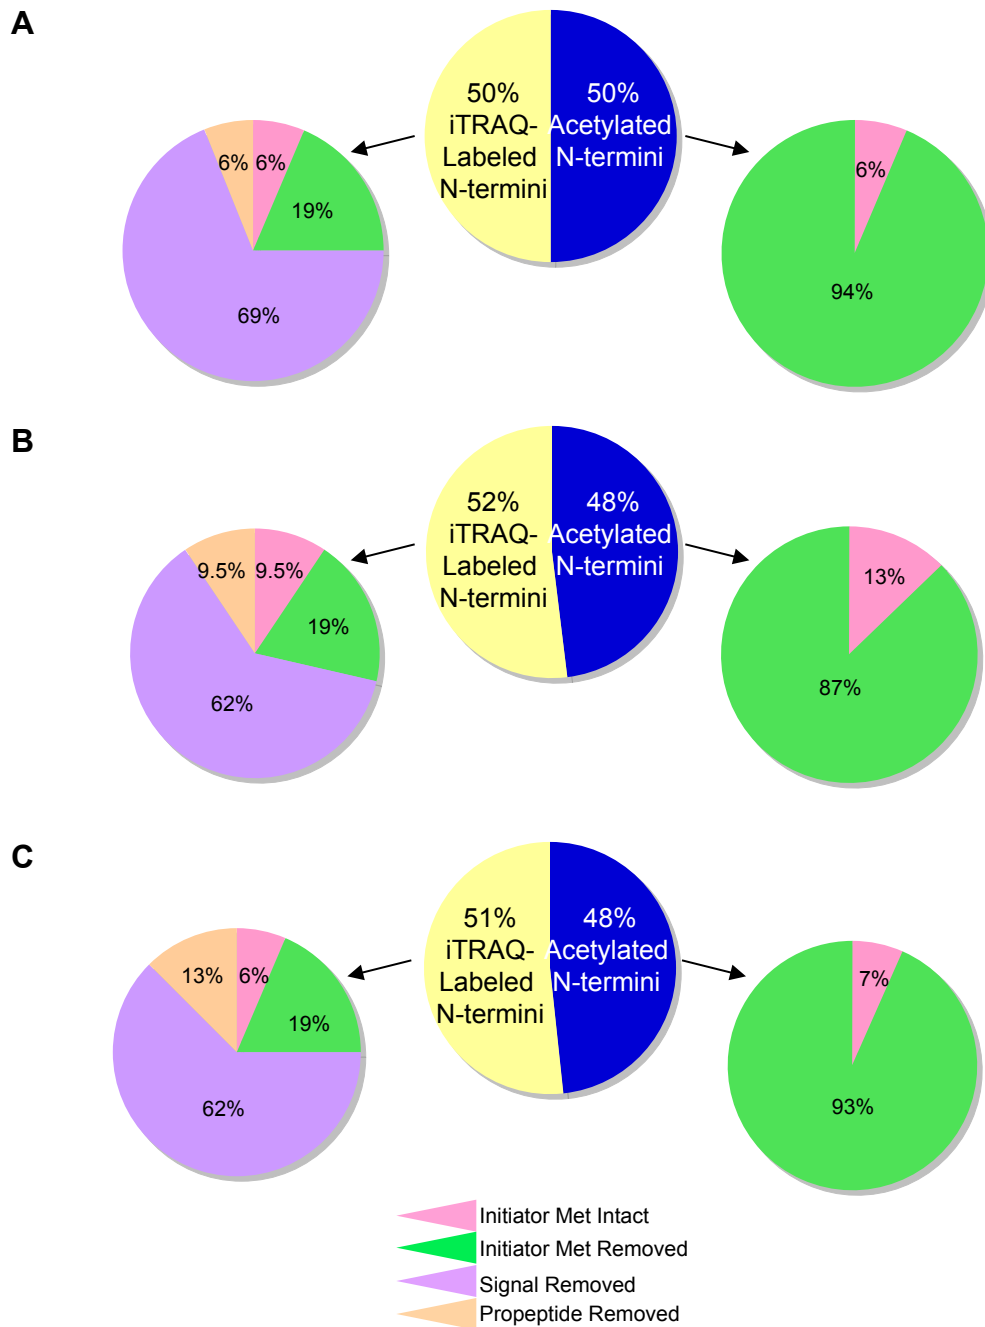

**Fig S2. Natural N-termini distribution**

Analysis of peptides identified in biological replicate experiments. Distribution of N-terminal modifications among original N-termini identified by TAILS analysis of (A) Exp1xExp2 (n=133 peptides), (B) Exp1 (n=82 peptides), (C) Exp2 (n=31 peptides).

### Supplementary Material

Tables of all identified peptides identified by Mascot and X! Tandem from iTRAQ-TAILS analyses of proteins from sMT6-MMPΔF (iTRAQ 114) or sMT6-MMP(E234A) (iTRAQ 115) treated secretome. iTRAQ ratios represent uncorrected values; peptides used for normalization are highlighted with yellow. Spectra assigned to quantifiable peptides with an iProphet probability (Prob) of > 0.95 were further analyzed. The charge (z) state of the peptide, precursor mass and error, N-terminus modification, and associated international protein index (IPI) number are indicated.

#### SUPPLEMENTARY TABLE I

##### Proteomic iTRAQ-TAILS analysis of sMT6-MMP cleaved fibroblast secretome

The Exp1XExp2 data set, including 32 unique peptides that were used for normalization having a standard deviation of 0.24.

| #  | Prob | z  | Precursor Mass | Error [Da] | N-terminus | Peptide                                              | iTRAQ 114/<br>iTRAQ 115 | IPI#        |
|----|------|----|----------------|------------|------------|------------------------------------------------------|-------------------------|-------------|
| 1  | 1.00 | 3  | 1774.9877      | 0.046      | iTRAQ      | n[145.11]ADANLEAGNVK[272.20]ETR                      | 0.70                    | IPI00328113 |
| 2  | 0.98 | 2  | 1089.5605      | 0.0069     | iTRAQ      | n[145.11]ADLSEAA NR                                  | 1.06                    | IPI00418471 |
| 3  | 0.98 | 2  | 1319.5791      | 0.008      | iTRAQ      | n[145.11]AEGPDEDSSNR                                 | 0.96                    | IPI00009904 |
| 4  | 0.97 | 2  | 1245.611       | 0.0039     | iTRAQ      | n[145.11]AEQNDSVSPR                                  | 0.86                    | IPI00005564 |
| 5  | 1.00 | 3  | 2048.1435      | 0.0936     | iTRAQ      | n[145.11]AGAAAGGPGVSGVC[160.03]VC[160.03]K[272.20]SR | 1.27                    | IPI00016915 |
| 6  | 0.99 | 2  | 1119.535       | -0.0081    | iTRAQ      | n[145.11]AGFAGDDAPR                                  | 1.16                    | IPI00008603 |
| 7  | 0.94 | 2  | 1214.5412      | -0.0601    | iTRAQ      | n[145.11]APDQDEIQR                                   | 0.80                    | IPI00021794 |
| 8  | 0.99 | 10 | 1360.6693      | -0.064     | iTRAQ      | n[145.11]APPAAGQQQPPR                                | 0.89                    | IPI00002802 |
| 9  | 1.00 | 3  | 2631.2742      | 0.0195     | iTRAQ      | n[145.11]AQEPTGNNAEIC[160.03]LLPLDYGPC[160.03]R      | 0.87                    | IPI00009198 |
| 10 | 1.00 | 2  | 1324.5832      | -0.0665    | iTRAQ      | n[145.11]ASEGGFTATGQR                                | 0.67                    | IPI00003351 |
| 11 | 0.98 | 2  | 1208.635       | 0.0079     | iTRAQ      | n[145.11]ASSPGGVYATR                                 | 0.96                    | IPI00418471 |
| 12 | 0.90 | 2  | 1088.6363      | -0.0104    | iTRAQ      | n[145.11]AVFPSIVGR                                   | 1.93                    | IPI00008603 |
| 13 | 0.94 | 2  | 1250.6166      | -0.0033    | iTRAQ      | n[145.11]AVYLPNC[160.03]DR                           | 2.58                    | IPI00029236 |
| 14 | 1.00 | 2  | 1523.7077      | -0.066     | iTRAQ      | n[145.11]DAGEFVDLYVPR                                | 0.76                    | IPI00017448 |
| 15 | 1.00 | 3  | 1664.7441      | -0.105     | iTRAQ      | n[145.11]DAPEEEDHVLVLR                               | 1.02                    | IPI00010796 |
| 16 | 0.97 | 3  | 1340.5895      | -0.0336    | iTRAQ      | n[145.11]DAPQDFHPDR                                  | 0.76                    | IPI00302592 |
| 17 | 0.85 | 2  | 931.4782       | -0.0063    | iTRAQ      | n[145.11]DDANVVR                                     | 0.98                    | IPI00297646 |
| 18 | 1.00 | 3  | 2265.1457      | 0.0605     | iTRAQ      | n[145.11]DDEVDVDGTVEEDLGK[272.20]SR                  | 0.76                    | IPI00027230 |
| 19 | 1.00 | 3  | 1503.8389      | 0.0473     | iTRAQ      | n[145.11]DGVGGDPAVALPHR                              | 0.98                    | IPI00026530 |
| 20 | 0.97 | 2  | 1197.6032      | -0.0629    | iTRAQ      | n[145.11]DIPAMLPAAR                                  | 0.62                    | IPI00329688 |
| 21 | 0.96 | 2  | 1362.6771      | 0.02       | iTRAQ      | n[145.11]DLEPGTMDSVR                                 | 1.10                    | IPI00007752 |

| #  | Prob | z  | Precursor Mass | Error [Da] | N-terminus | Peptide                                      | iTRAQ 114/<br>iTRAQ 115 | IPI#        |
|----|------|----|----------------|------------|------------|----------------------------------------------|-------------------------|-------------|
| 22 | 0.99 | 2  | 1428.699       | -0.0592    | iTRAQ      | n[145.11]DLEPTVIDEVR                         | 0.82                    | IPI00166768 |
| 23 | 0.94 | 3  | 1658.6747      | -0.088     | iTRAQ      | n[145.11]DVLLEAC[160.03]C[160.03]ADGHR       | 1.15                    | IPI00218803 |
| 24 | 0.99 | 2  | 1343.5743      | -0.0694    | iTRAQ      | n[145.11]EAGEQGDIEPR                         | 0.88                    | IPI00012442 |
| 25 | 1.00 | 2  | 1506.7115      | -0.0842    | iTRAQ      | n[145.11]EFQTNLVPYPR                         | 1.11                    | IPI00007750 |
| 26 | 0.99 | 2  | 1362.7232      | 0.0219     | iTRAQ      | n[145.11]EGNFDAIANIR                         | 7.28                    | IPI00014758 |
| 27 | 1.00 | 3  | 2296.0773      | 0.0436     | iTRAQ      | n[145.11]FEGQLAEEC[160.03]GILNGC[160.03]ENGR | 1.04                    | IPI00292150 |
| 28 | 1.00 | 2  | 1497.6704      | -0.0633    | iTRAQ      | n[145.11]FQSDIGPYQSGR                        | 0.84                    | IPI00749245 |
| 29 | 0.99 | 3  | 2014.0746      | 0.0019     | iTRAQ      | n[145.11]FSLADAINTEFK[272.20]NTR             | 0.76                    | IPI00418471 |
| 30 | 1.00 | 3  | 1398.7356      | 0.023      | iTRAQ      | n[145.11]FVGGAENTAHPR                        | 0.63                    | IPI00029236 |
| 31 | 1.00 | 3  | 2207.0958      | -0.0695    | iTRAQ      | n[145.11]FYTK[272.20]PPQC[160.03]VDIPADLR    | 1.08                    | IPI00749245 |
| 32 | 0.99 | 2  | 1237.6386      | -0.0881    | iTRAQ      | n[145.11]GAPGILGLPGSR                        | 1.23                    | IPI00304962 |
| 33 | 0.99 | 2  | 1213.6913      | 0.0013     | iTRAQ      | n[145.11]GASSAGLGPVVR                        | 0.89                    | IPI00018305 |
| 34 | 0.99 | 2  | 1048.4493      | -0.0564    | iTRAQ      | n[145.11]GFAGDDAPR                           | 0.56                    | IPI00008603 |
| 35 | 0.99 | 2  | 1391.7565      | 0.0286     | iTRAQ      | n[145.11]GPPGLAGPPGESGR                      | 8.94                    | IPI00297646 |
| 36 | 1.00 | 2  | 1457.7211      | -0.0386    | iTRAQ      | n[145.11]GVQVETISPGDGR                       | 0.91                    | IPI00413778 |
| 37 | 0.98 | 2  | 1168.7094      | 0.0044     | iTRAQ      | n[145.11]IGGIGTVPVGR                         | 0.76                    | IPI00014424 |
| 38 | 0.87 | 2  | 1162.591       | -0.0042    | iTRAQ      | n[145.11]ISSPTETER                           | 1.12                    | IPI00013895 |
| 39 | 1.00 | 10 | 1670.9223      | 0.0127     | iTRAQ      | n[145.11]K[272.20]FVGGAENTAHPR               | 0.55                    | IPI00029236 |
| 40 | 0.99 | 3  | 1601.9943      | 0.0347     | iTRAQ      | n[145.11]K[272.20]LVIIHSDLER                 | 0.91                    | IPI00000230 |
| 41 | 0.94 | 3  | 1779.9023      | -0.07      | iTRAQ      | n[145.11]LADAINTEFK[272.20]NTR               | 1.35                    | IPI00418471 |
| 42 | 0.99 | 2  | 1373.7478      | 0.0206     | iTRAQ      | n[145.11]LGSDAELQIER                         | 0.82                    | IPI00182126 |
| 43 | 0.85 | 2  | 1019.4965      | -0.0557    | iTRAQ      | n[145.11]LPASFDAR                            | 0.92                    | IPI00295741 |
| 44 | 1.00 | 10 | 1962.7976      | -0.1031    | iTRAQ      | n[145.11]LQAEEC[160.03]GILNGC[160.03]ENGR    | 0.91                    | IPI00220249 |
| 45 | 0.97 | 3  | 1938.0001      | 0.0424     | iTRAQ      | n[145.11]LRPGDC[160.03]EVC[160.03]ISYLGR     | 0.97                    | IPI00328748 |
| 46 | 0.94 | 3  | 1610.9928      | 0.0581     | iTRAQ      | n[145.11]LTEAPLNPK[272.20]ANR                | 9.67                    | IPI00008603 |
| 47 | 1.00 | 2  | 1803.8284      | -0.0513    | iTRAQ      | n[145.11]LVGGPMDASVEEEGVR                    | 23.20                   | IPI00032293 |
| 48 | 0.98 | 3  | 1960.0246      | 0.044      | iTRAQ      | n[145.11]LVGGPMDASVEEEGVRR                   | 4.81                    | IPI00032293 |
| 49 | 0.97 | 2  | 1313.6862      | -0.0814    | iTRAQ      | n[145.11]LVILEGELER                          | 3.09                    | IPI00010779 |
| 50 | 0.99 | 2  | 1611.8739      | 0.0134     | iTRAQ      | n[145.11]MPPYTVVYFPVR                        | 0.76                    | IPI00219757 |
| 51 | 1.00 | 3  | 2241.2008      | 0.0131     | iTRAQ      | n[145.11]PGGLLLGDVAPNFEANTTVGR               | 0.86                    | IPI00220301 |
| 52 | 0.95 | 2  | 1480.7433      | -0.0767    | iTRAQ      | n[145.11]PPYTVVYFPVR                         | 0.89                    | IPI00219757 |
| 53 | 1.00 | 2  | 1466.6345      | -0.0782    | iTRAQ      | n[145.11]SAGDVDTLAFDGR                       | 0.93                    | IPI00374563 |
| 54 | 0.99 | 2  | 1257.5589      | -0.0668    | iTRAQ      | n[145.11]SAPLAAGC[160.03]PDR                 | 0.83                    | IPI00003176 |
| 55 | 0.99 | 2  | 1714.8958      | 0.0276     | iTRAQ      | n[145.11]SDMPPLTLEGIQDR                      | 0.92                    | IPI00022442 |

| #  | Prob | z | Precursor Mass | Error [Da] | N-terminus | Peptide                                             | iTRAQ 114/<br>iTRAQ 115 | IPI#        |
|----|------|---|----------------|------------|------------|-----------------------------------------------------|-------------------------|-------------|
| 56 | 1.00 | 2 | 1782.7434      | -0.0963    | iTRAQ      | n[145.11]SDVLELTDDNFESR                             | 0.93                    | IPI00025252 |
| 57 | 1.00 | 3 | 1595.899       | 0.0479     | iTRAQ      | n[145.11]SK[272.20]FADLSEAANR                       | 0.98                    | IPI00418471 |
| 58 | 1.00 | 3 | 1867.0747      | 0.0704     | iTRAQ      | n[145.11]SLADAINTEFK[272.20]NTR                     | 1.78                    | IPI00418471 |
| 59 | 0.99 | 2 | 1619.9115      | 0.0362     | iTRAQ      | n[145.11]SLLSLGSQYQPQR                              | 0.67                    | IPI00002802 |
| 60 | 1.00 | 2 | 1914.9535      | -0.0597    | iTRAQ      | n[145.11]SLNNQIETLLTPEGSR                           | 4.06                    | IPI00304962 |
| 61 | 0.90 | 2 | 1026.4892      | -0.0688    | iTRAQ      | n[145.11]SLPEAGPGR                                  | 0.82                    | IPI00017968 |
| 62 | 1.00 | 3 | 1522.8515      | 0.029      | iTRAQ      | n[145.11]SPALTIENEHIR                               | 1.07                    | IPI00012989 |
| 63 | 0.97 | 2 | 1219.5808      | -0.0109    | iTRAQ      | n[145.11]SQDASDGLQR                                 | 0.93                    | IPI00009276 |
| 64 | 0.94 | 2 | 1137.5298      | -0.0602    | iTRAQ      | n[145.11]SSPGGVYATR                                 | 0.50                    | IPI00418471 |
| 65 | 0.97 | 3 | 1615.8491      | 0.0164     | iTRAQ      | n[145.11]STVIHYEIPER                                | 0.65                    | IPI00001872 |
| 66 | 0.99 | 2 | 1934.0204      | 0.0337     | iTRAQ      | n[145.11]SYELPDGQVITIGNER                           | 1.03                    | IPI00003269 |
| 67 | 0.99 | 3 | 1671.8865      | -0.0902    | iTRAQ      | n[145.11]VDVSK[272.20]PDLTAALR                      | 0.88                    | IPI00418471 |
| 68 | 0.99 | 2 | 973.5266       | -0.0161    | iTRAQ      | n[145.11]VGAAGATGAR                                 | 2.02                    | IPI00304962 |
| 69 | 1.00 | 2 | 1680.7951      | -0.0676    | iTRAQ      | n[145.11]VLSGGTTMYPGIADR                            | 3.83                    | IPI00008603 |
| 70 | 0.97 | 2 | 1234.6085      | -0.0707    | iTRAQ      | n[145.11]VNFTVDQIR                                  | 0.89                    | IPI00186290 |
| 71 | 0.96 | 2 | 1286.6425      | -0.072     | iTRAQ      | n[145.11]YTVVYFPVR                                  | 1.22                    | IPI00219757 |
| 72 | 1.00 | 2 | 1328.6829      | -0.0705    | Ac-lysine  | n[43.02]AATTGSGVK[272.20]VPR                        | 1.00                    | IPI00472498 |
| 73 | 0.97 | 2 | 1231.7108      | -0.0669    | Ac-lysine  | n[43.02]AAYK[272.20]LVLIR                           | 0.91                    | IPI00374975 |
| 74 | 1.00 | 2 | 1750.759       | -0.0537    | Ac-lysine  | n[43.02]ADK[272.20]EAAFDDAVEER                      | 0.88                    | IPI00328319 |
| 75 | 0.94 | 2 | 1343.7946      | 0.0052     | Ac-lysine  | n[43.02]AGITTIEAVK[272.20]R                         | 0.76                    | IPI00218319 |
| 76 | 0.99 | 2 | 1342.7025      | -0.0665    | Ac-lysine  | n[43.02]AGLNSLEAVK[272.20]R                         | 0.83                    | IPI00010779 |
| 77 | 0.98 | 3 | 2272.1472      | 0.0345     | Ac-lysine  | n[43.02]ALDGPEQMELEEGK[272.20]AGSGLR                | 1.58                    | IPI00023919 |
| 78 | 0.94 | 2 | 1352.6585      | -0.0043    | Ac-lysine  | n[43.02]ANK[272.20]GPSYGMSR                         | 0.57                    | IPI00216138 |
| 79 | 0.87 | 3 | 2188.0652      | 0.0105     | Ac         | n[43.02]ARSASAAAMGVQVETISPGDGR                      | na                      | IPI00413778 |
| 80 | 0.99 | 3 | 1831.9619      | -0.0628    | Ac-lysine  | n[43.02]ASSDIQVK[272.20]ELEK[272.20]R               | 0.71                    | IPI00479997 |
| 81 | 0.87 | 2 | 1389.751       | -0.0075    | Ac-lysine  | n[43.02]ATDELATK[272.20]LSR                         | 1.01                    | IPI00060181 |
| 82 | 0.93 | 2 | 1198.7136      | -0.002     | Ac-lysine  | n[43.02]AVSTGVK[272.20]VPR                          | 0.82                    | IPI00019600 |
| 83 | 0.98 | 3 | 2938.2397      | -0.08      | Ac-lysine  | n[43.02]DDDIAALVVDNGSGMC[160.03]K[272.20]AGFAGDDAPR | 0.86                    | IPI00021439 |
| 84 | 0.83 | 3 | 2994.4559      | 0.0742     | Ac-lysine  | n[43.02]EEEIAALVIDNGSGMC[160.03]K[272.20]AGFAGDDAPR | 0.80                    | IPI00021440 |
| 85 | 0.99 | 2 | 1630.808       | -0.0637    | Ac-lysine  | n[43.02]MEK[272.20]TLETVPLER                        | 0.87                    | IPI00396378 |
| 86 | 0.95 | 2 | 1134.6073      | -0.0042    | Ac-lysine  | n[43.02]SK[272.20]NTVSSAR                           | 0.70                    | IPI00007280 |
| 87 | 0.99 | 2 | 1678.8586      | 0.0302     | Ac-lysine  | n[43.02]SQAEFEK[272.20]AAEEVR                       | 0.91                    | IPI00010182 |
| 88 | 0.86 | 2 | 1429.652       | 0.032      | Ac-lysine  | n[43.02]SSNEC[160.03]FK[272.20]C[160.03]GR          | 0.91                    | IPI00430813 |
| 89 | 0.98 | 2 | 1569.9127      | 0.0279     | Ac-lysine  | n[43.02]VDVSK[272.20]PDLTAALR                       | 0.82                    | IPI00418471 |

**SUPPLEMENTARY TABLE II****Proteomic iTRAQ-TAILS analysis of sMT6-MMP cleaved fibroblast secretome**

The Exp1 data set, including 82 unique peptides that were used for normalization having a standard deviation of 0.27.

| #  | Prob. | z | Precursor<br>Mass | Error [Da] | N-term | Peptide                                           | iTRAQ 114/<br>iTRAQ 115 | IPI #       |
|----|-------|---|-------------------|------------|--------|---------------------------------------------------|-------------------------|-------------|
| 1  | 0.99  | 3 | 1797.0499         | 0.0648     | iTRAQ  | n[145.11]AAK[272.20]FDGILGMAYPR                   | 1.28                    | IPI00011229 |
| 2  | 0.91  | 3 | 1758.0221         | 0.0593     | iTRAQ  | n[145.11]AAQTSPSPK[272.20]AGAATGR                 | 0.83                    | IPI00303476 |
| 3  | 0.89  | 2 | 1254.767          | 0.0253     | iTRAQ  | n[145.11]AATLILEPAGR                              | 0.96                    | IPI00220906 |
| 4  | 0.94  | 2 | 1093.5718         | -0.0169    | iTRAQ  | n[145.11]AAAYEEVIR                                | 1.12                    | IPI00003406 |
| 5  | 0.91  | 3 | 1666.9326         | 0.0444     | iTRAQ  | n[145.11]ADAINTEFK[272.20]NTR                     | 1.07                    | IPI00418471 |
| 6  | 0.97  | 2 | 1931.8637         | -0.0766    | iTRAQ  | n[145.11]ADGFYGDVAVTAK[272.20]NC[160.03]R         | 0.85                    | IPI00375294 |
| 7  | 0.92  | 4 | 2539.4065         | 0.0934     | iTRAQ  | n[145.11]AEEAK[272.20]TFDQLTPEESK[272.20]ER       | 0.96                    | IPI00014537 |
| 8  | 0.90  | 2 | 1199.5294         | -0.0069    | iTRAQ  | n[145.11]AEFSSEAC[160.03]R                        | 0.97                    | IPI00030877 |
| 9  | 0.91  | 2 | 1081.5782         | -0.0107    | iTRAQ  | n[145.11]AELSYSLR                                 | 0.96                    | IPI00298793 |
| 10 | 0.99  | 2 | 1770.9684         | 0.0298     | iTRAQ  | n[145.11]AEQVPLVLWSSDR                            | 0.81                    | IPI00552748 |
| 11 | 0.97  | 3 | 2312.3004         | 0.0817     | iTRAQ  | n[145.11]AFK[272.20]QMEQISQFLQAAER                | 1.27                    | IPI00550363 |
| 12 | 0.98  | 2 | 1408.7693         | 0.022      | iTRAQ  | n[145.11]AGEFVDLYVPR                              | 1.20                    | IPI00017448 |
| 13 | 0.99  | 2 | 1594.7997         | 0.0176     | iTRAQ  | n[145.11]AGEPGEPGQTGPAGAR                         | 0.86                    | IPI00304962 |
| 14 | 1.00  | 3 | 2544.2327         | -0.042     | iTRAQ  | n[145.11]AGHPSLK[272.20]QDAC[160.03]QGDSGGVFAVR   | 1.16                    | IPI00296165 |
| 15 | 0.96  | 3 | 2276.1764         | -0.0029    | iTRAQ  | n[145.11]AHYNTEILK[272.20]SIDNEWR                 | 1.34                    | IPI00028076 |
| 16 | 0.88  | 2 | 1345.7106         | 0.0147     | iTRAQ  | n[145.11]AILEDEQTR                                | 0.83                    | IPI00215743 |
| 17 | 0.89  | 3 | 1480.8309         | 0.0068     | iTRAQ  | n[145.11]AINTFEFK[272.20]NTR                      | 0.57                    | IPI00418471 |
| 18 | 0.95  | 3 | 2145.2505         | 0.0355     | iTRAQ  | n[145.11]AIVFIK[272.20]QPSSQDALQGR                | 0.66                    | IPI00168813 |
| 19 | 0.92  | 3 | 1504.8758         | 0.0301     | iTRAQ  | n[145.11]ALK[272.20]GTNESLER                      | 0.83                    | IPI00418471 |
| 20 | 0.99  | 2 | 1516.7525         | 0.0286     | iTRAQ  | n[145.11]ALQQQADEAEDR                             | 0.60                    | IPI00010779 |
| 21 | 1.00  | 3 | 1856.0639         | 0.0602     | iTRAQ  | n[145.11]ASGANFEYIIAEK[272.20]R                   | 0.75                    | IPI00024993 |
| 22 | 0.99  | 2 | 1652.9418         | 0.0563     | iTRAQ  | n[145.11]ASPAGGPLEDVVIER                          | 0.71                    | IPI00303300 |
| 23 | 0.94  | 2 | 989.5478          | -0.0149    | iTRAQ  | n[145.11]ASVATELR                                 | 0.87                    | IPI00013874 |
| 24 | 0.96  | 2 | 1753.8731         | 0.0369     | iTRAQ  | n[145.11]ASVPTTC[160.03]C[160.03]FNLANR           | 0.93                    | IPI00019945 |
| 25 | 0.92  | 2 | 1129.6684         | 0.0107     | iTRAQ  | n[145.11]AVLSAEQLR                                | 0.93                    | IPI00032140 |
| 26 | 1.00  | 3 | 2692.3416         | -0.0371    | iTRAQ  | n[145.11]AVTVETSDHDNSLSVSIPQPSPLR                 | 0.75                    | IPI00027377 |
| 27 | 0.98  | 3 | 1595.9039         | 0.0532     | iTRAQ  | n[145.11]DAINTEFK[272.20]NTR                      | 0.85                    | IPI00418471 |
| 28 | 0.99  | 3 | 1981.1147         | 0.0271     | iTRAQ  | n[145.11]DAPSWDPVALK[272.20]LPER                  | 0.98                    | IPI00329482 |
| 29 | 0.91  | 2 | 1125.5266         | 0.0093     | iTRAQ  | n[145.11]DASGTNDFR                                | 0.90                    | IPI00016112 |
| 30 | 1.00  | 3 | 2536.3792         | 0.0527     | iTRAQ  | n[145.11]DDLVTVK[272.20]TPAFAESVTEGDVR            | 0.58                    | IPI00384016 |
| 31 | 0.99  | 4 | 2199.1601         | 0.0945     | iTRAQ  | n[145.11]DEAIHC[160.03]PPC[160.03]SEEK[272.20]LAR | 0.88                    | IPI00305380 |
| 32 | 0.95  | 2 | 1159.6308         | -0.0011    | iTRAQ  | n[145.11]DEATALQLR                                | 0.87                    | IPI00014898 |
| 33 | 0.98  | 3 | 1580.8435         | 0.0155     | iTRAQ  | n[145.11]DEEVHAGLGELLR                            | 1.18                    | IPI00032140 |
| 34 | 0.92  | 2 | 1212.5675         | 0.0108     | iTRAQ  | n[145.11]DGEFSMDLR                                | 1.11                    | IPI00216691 |
| 35 | 0.96  | 2 | 1660.7877         | 0.0386     | iTRAQ  | n[145.11]DLDGSEDWVYYR                             | 0.83                    | IPI00036578 |
| 36 | 0.83  | 2 | 1018.5128         | -0.0037    | iTRAQ  | n[145.11]DLSEAANR                                 | 0.93                    | IPI00418471 |
| 37 | 0.96  | 3 | 1589.8614         | 0.0361     | iTRAQ  | n[145.11]DNADSSPVVDK[272.20]R                     | 0.69                    | IPI00328753 |
| 38 | 0.98  | 2 | 1411.6715         | 0.0192     | iTRAQ  | n[145.11]DNEAIYDIC[160.03]R                       | 0.96                    | IPI00007750 |
| 39 | 0.96  | 2 | 1574.8468         | 0.0082     | iTRAQ  | n[145.11]DQALEALSASLGTR                           | 0.89                    | IPI00220857 |

| #  | Prob. | z | Precursor Mass | Error [Da] | N-term | Peptide                                                       | iTRAQ 114/<br>iTRAQ 115 | IPI #       |
|----|-------|---|----------------|------------|--------|---------------------------------------------------------------|-------------------------|-------------|
| 40 | 1.00  | 3 | 2161.148       | 0.0223     | iTRAQ  | n[145.11]DQDFYSLGVS[272.20]TASSR                              | 0.92                    | IPI00293260 |
| 41 | 1.00  | 3 | 1768.048       | 0.0506     | iTRAQ  | n[145.11]DSK[272.20]LTFDAITIR                                 | 0.64                    | IPI00008561 |
| 42 | 0.93  | 3 | 1665.9548      | 0.0621     | iTRAQ  | n[145.11]DSK[272.20]VFGDLQVR                                  | 0.94                    | IPI00184375 |
| 43 | 1.00  | 3 | 2430.3027      | 0.0756     | iTRAQ  | n[145.11]DSVDFSLADAINTEFK[272.20]NTR                          | 0.88                    | IPI00418471 |
| 44 | 0.95  | 2 | 1045.6097      | 0.0207     | iTRAQ  | n[145.11]DSVLDVVR                                             | 1.01                    | IPI00007752 |
| 45 | 0.99  | 3 | 1641.8732      | 0.0535     | iTRAQ  | n[145.11]DSYVGDEAQS[272.20]R                                  | 0.87                    | IPI00008603 |
| 46 | 0.86  | 2 | 1336.6954      | 0.0097     | iTRAQ  | n[145.11]EANAPGPVPER                                          | 0.96                    | IPI00301144 |
| 47 | 0.96  | 2 | 1368.6814      | 0.0167     | iTRAQ  | n[145.11]EATTEFSVDAR                                          | 1.00                    | IPI00302592 |
| 48 | 0.94  | 2 | 1272.6151      | 0.0261     | iTRAQ  | n[145.11]EDC[160.03]NELPPR                                    | 0.81                    | IPI00029739 |
| 49 | 0.96  | 2 | 1496.7031      | 0.0279     | iTRAQ  | n[145.11]EDDETIPSEYR                                          | 0.69                    | IPI00220857 |
| 50 | 0.96  | 2 | 1466.7117      | -0.0006    | iTRAQ  | n[145.11]EEAENTLQSF                                           | 0.96                    | IPI00418471 |
| 51 | 1.00  | 2 | 1382.7015      | 0.0393     | iTRAQ  | n[145.11]EEATLNEMFR                                           | 1.27                    | IPI00002714 |
| 52 | 1.00  | 3 | 2619.0719      | -0.0524    | iTRAQ  | n[145.11]EEGQC[160.03]VC[160.03]DEGFAGVDC[160.03]SEK[272.20]R | 1.01                    | IPI00867560 |
| 53 | 0.90  | 2 | 1398.7158      | 0.0301     | iTRAQ  | n[145.11]EEQPPETAAQR                                          | 0.72                    | IPI00386755 |
| 54 | 0.91  | 4 | 2060.1943      | 0.1108     | iTRAQ  | n[145.11]EK[272.20]IWHHTFYNELR                                | 0.81                    | IPI00021428 |
| 55 | 0.98  | 3 | 1624.8857      | 0.038      | iTRAQ  | n[145.11]ELQAVLHMEQR                                          | 0.91                    | IPI00295542 |
| 56 | 0.98  | 2 | 1699.9386      | 0.0371     | iTRAQ  | n[145.11]EQQVPLVWSSDR                                         | 0.72                    | IPI00552748 |
| 57 | 0.99  | 2 | 1507.8143      | 0.0292     | iTRAQ  | n[145.11]ESETTSLVLR                                           | 0.95                    | IPI00029744 |
| 58 | 0.98  | 2 | 1361.7215      | 0.0154     | iTRAQ  | n[145.11]ESPAVAAPAYSR                                         | 0.74                    | IPI00025512 |
| 59 | 0.85  | 3 | 1848.0448      | 0.0616     | iTRAQ  | n[145.11]EVDALK[272.20]GTNESLR                                | 0.78                    | IPI00418471 |
| 60 | 0.96  | 2 | 991.4714       | -0.0131    | iTRAQ  | n[145.11]FAGDDAPR                                             | 1.10                    | IPI00008603 |
| 61 | 0.94  | 2 | 1139.5453      | 0.0126     | iTRAQ  | n[145.11]FSDAASQR                                             | 0.88                    | IPI00472013 |
| 62 | 0.92  | 4 | 2659.2664      | -0.0352    | iTRAQ  | n[145.11]FEK[272.20]NEAIQAAHDAVAQEGQC[160.03]R                | 1.04                    | IPI00018352 |
| 63 | 0.94  | 2 | 1396.6584      | 0.0243     | iTRAQ  | n[145.11]FGSDQSENVDR                                          | 0.75                    | IPI00258804 |
| 64 | 0.85  | 4 | 2325.2831      | -0.0339    | iTRAQ  | n[145.11]FK[272.20]DTGK[272.20]APVEPEVAIHR                    | 0.58                    | IPI00176655 |
| 65 | 0.97  | 3 | 1828.9918      | 0.0571     | iTRAQ  | n[145.11]FYQGPVGDPAK[272.20]YR                                | 7.65                    | IPI00014758 |
| 66 | 0.98  | 3 | 1677.8374      | 0.0319     | iTRAQ  | n[145.11]GAFEGTHMGPFVER                                       | 0.77                    | IPI00100980 |
| 67 | 0.98  | 2 | 1238.7319      | 0.0212     | iTRAQ  | n[145.11]GAPEVLVSAPR                                          | 0.85                    | IPI00143921 |
| 68 | 1.00  | 2 | 1483.7193      | 0.0419     | iTRAQ  | n[145.11]GDPGEAGPQGDQGR                                       | 1.51                    | IPI00291136 |
| 69 | 0.97  | 4 | 1934.9834      | 0.0163     | iTRAQ  | n[145.11]GDTYFFK[272.20]GAHYWR                                | 15.22                   | IPI00014758 |
| 70 | 0.99  | 2 | 1462.7941      | 0.0294     | iTRAQ  | n[145.11]GEAGSAGPPGPPGLR                                      | 1.31                    | IPI00304962 |
| 71 | 0.98  | 2 | 1469.6609      | -0.0122    | iTRAQ  | n[145.11]GEDC[160.03]LWYLDR                                   | 0.96                    | IPI00514190 |
| 72 | 0.99  | 2 | 1337.7341      | 0.0244     | iTRAQ  | n[145.11]GEFVDLYVPR                                           | 0.74                    | IPI00017448 |
| 73 | 0.96  | 2 | 1240.6523      | 0.0241     | iTRAQ  | n[145.11]GEPGQTGPAGAR                                         | 0.57                    | IPI00304962 |
| 74 | 0.94  | 3 | 1788.0879      | 0.0589     | iTRAQ  | n[145.11]GFPGTPGLPGFK[272.20]GIR                              | 0.74                    | IPI00304962 |
| 75 | 0.91  | 2 | 1381.6981      | 0.0199     | iTRAQ  | n[145.11]GGTTMYPGIADR                                         | 1.23                    | IPI00008603 |
| 76 | 0.96  | 2 | 1394.8031      | 0.0279     | iTRAQ  | n[145.11]GIPGPVGAAGATGAR                                      | 0.77                    | IPI00304962 |
| 77 | 0.99  | 3 | 1671.9502      | 0.0315     | iTRAQ  | n[145.11]GK[272.20]DYYQTLGLAR                                 | 0.79                    | IPI00015947 |
| 78 | 1.00  | 3 | 1859.0205      | 0.0182     | iTRAQ  | n[145.11]GLGLSYLSSHIANVER                                     | 1.30                    | IPI00026314 |
| 79 | 0.99  | 2 | 1384.6188      | 0.0141     | iTRAQ  | n[145.11]GMEEGEFSEAR                                          | 1.27                    | IPI00007750 |
| 80 | 0.97  | 2 | 1317.7038      | -0.0129    | iTRAQ  | n[145.11]GNPITIFQER                                           | 0.92                    | IPI00219018 |
| 81 | 0.94  | 3 | 1650.9688      | 0.0391     | iTRAQ  | n[145.11]GNSTAIQELFK[272.20]R                                 | 1.10                    | IPI00007752 |
| 82 | 0.99  | 2 | 1365.6409      | 0.0279     | iTRAQ  | n[145.11]GSTAEDEEQTR                                          | 0.80                    | IPI00180404 |
| 83 | 0.98  | 2 | 1258.5391      | 0.0055     | iTRAQ  | n[145.11]GYGNDGFDDR                                           | 1.09                    | IPI00013877 |

| #   | Prob. | z | Precursor Mass | Error [Da] | N-term | Peptide                                                   | iTRAQ 114/<br>iTRAQ 115 | IPI #       |
|-----|-------|---|----------------|------------|--------|-----------------------------------------------------------|-------------------------|-------------|
| 84  | 0.90  | 2 | 1275.6142      | -0.0075    | iTRAQ  | n[145.11]GYSFTTTAER                                       | 1.20                    | IPI00021439 |
| 85  | 1.00  | 3 | 1437.7421      | 0.0298     | iTRAQ  | n[145.11]HWPSEPSEAVR                                      | 0.69                    | IPI00028911 |
| 86  | 1.00  | 3 | 2156.0091      | 0.07       | iTRAQ  | n[145.11]HWYVGEGMEEGFSEAR                                 | 0.76                    | IPI00007750 |
| 87  | 0.90  | 2 | 1053.6618      | -0.005     | iTRAQ  | n[145.11]IALDLLPR                                         | 0.83                    | IPI00470607 |
| 88  | 0.91  | 2 | 1303.7144      | -0.0223    | iTRAQ  | n[145.11]IEGAGNFLAIR                                      | 0.85                    | IPI00036578 |
| 89  | 0.90  | 3 | 2206.1322      | 0.1715     | iTRAQ  | n[145.11]ISGGMGSMNSVTGGMGMLDR                             | 0.89                    | IPI00555833 |
| 90  | 0.99  | 3 | 1709.9516      | 0.0579     | iTRAQ  | n[145.11]ITGK[272.20]EDAANNYAR                            | 1.14                    | IPI00007750 |
| 91  | 0.95  | 2 | 1216.6345      | -0.0017    | iTRAQ  | n[145.11]IYSSFGFPR                                        | 6.44                    | IPI00008561 |
| 92  | 1.00  | 3 | 1391.7772      | 0.0375     | iTRAQ  | n[145.11]K[272.20]AGFAGDDAPR                              | 1.17                    | IPI00008603 |
| 93  | 0.97  | 3 | 1586.0061      | 0.0415     | iTRAQ  | n[145.11]K[272.20]LVILEGELER                              | 0.78                    | IPI00010779 |
| 94  | 0.97  | 3 | 1790.063       | 0.0336     | iTRAQ  | n[145.11]K[272.20]QDIVFDGIAQIR                            | 0.84                    | IPI00027780 |
| 95  | 1.00  | 3 | 2061.1567      | 0.0435     | iTRAQ  | n[145.11]K[272.20]SPQELLC[160.03]GASLISDR                 | 1.00                    | IPI00019568 |
| 96  | 0.93  | 3 | 2206.2426      | 0.0589     | iTRAQ  | n[145.11]K[272.20]SYELPDGQVITIGNER                        | 0.85                    | IPI00008603 |
| 97  | 1.00  | 3 | 2041.1721      | 0.0786     | iTRAQ  | n[145.11]K[272.20]VEQAVETEPEPELR                          | 1.01                    | IPI00021842 |
| 98  | 0.99  | 2 | 1462.7947      | 0.0158     | iTRAQ  | n[145.11]LDSELTTEFLR                                      | 0.56                    | IPI00014572 |
| 99  | 0.96  | 2 | 1327.6581      | 0.0051     | iTRAQ  | n[145.11]LEAAYEFADR                                       | 4.39                    | IPI00008561 |
| 100 | 0.99  | 2 | 1350.8027      | -0.0078    | iTRAQ  | n[145.11]LGAPGILGLPGSR                                    | 1.12                    | IPI00304962 |
| 101 | 0.85  | 3 | 2239.1765      | 0.0308     | iTRAQ  | n[145.11]LGRPSEEEDELVVPELER                               | 0.80                    | IPI00005908 |
| 102 | 1.00  | 3 | 1823.0475      | 0.0694     | iTRAQ  | n[145.11]LITGK[272.20]EDAANNYAR                           | 5.70                    | IPI00007750 |
| 103 | 0.97  | 4 | 2425.1005      | -0.0328    | iTRAQ  | n[145.11]LK[272.20]C[160.03]LYHTEGEHC[160.03]QFC[160.03]R | 0.90                    | IPI00013976 |
| 104 | 0.84  | 2 | 1199.6199      | -0.0221    | iTRAQ  | n[145.11]LLDPAAWDR                                        | 4.89                    | IPI00010800 |
| 105 | 0.98  | 2 | 1463.9151      | 0.0205     | iTRAQ  | n[145.11]LLGAPGILGLPGSR                                   | 1.19                    | IPI00304962 |
| 106 | 0.98  | 2 | 1532.8693      | 0.026      | iTRAQ  | n[145.11]LLSLGSQYQPQR                                     | 4.19                    | IPI00002802 |
| 107 | 0.98  | 2 | 1257.7433      | 0.0084     | iTRAQ  | n[145.11]LMNLGGLAVAR                                      | 1.13                    | IPI00550363 |
| 108 | 0.96  | 2 | 1879.9943      | -0.0603    | iTRAQ  | n[145.11]LPVC[160.03]GK[272.20]PVNPVEQR                   | 0.87                    | IPI00296165 |
| 109 | 1.00  | 2 | 1581.8121      | 0.0174     | iTRAQ  | n[145.11]LSGGTTMYPGIADR                                   | 1.07                    | IPI00008603 |
| 110 | 0.98  | 2 | 1419.7563      | -0.0029    | iTRAQ  | n[145.11]LSLGSQYQPQR                                      | 1.87                    | IPI00002802 |
| 111 | 0.86  | 3 | 2125.2004      | 0.004      | iTRAQ  | n[145.11]LSTC[160.03]K[272.20]TIDMELVK[272.20]R           | 0.93                    | IPI00000075 |
| 112 | 0.94  | 2 | 1179.6375      | 0.0118     | iTRAQ  | n[145.11]LTFEELER                                         | 0.92                    | IPI00180404 |
| 113 | 0.99  | 2 | 1574.8363      | 0.0267     | iTRAQ  | n[145.11]LVDLEPGTMDSVR                                    | 1.22                    | IPI00007752 |
| 114 | 1.00  | 3 | 2424.2278      | 0.0508     | iTRAQ  | n[145.11]LVVDNGSGMC[160.03]K[272.20]AGFAGDDAPR            | 4.00                    | IPI00021439 |
| 115 | 0.88  | 3 | 2200.0873      | 0.0106     | iTRAQ  | n[145.11]LYSSDDVIELTPSNFNR                                | 0.40                    | IPI00299571 |
| 116 | 0.98  | 2 | 1126.6406      | 0.0119     | iTRAQ  | n[145.11]MAPTPIPTR                                        | 0.87                    | IPI00003406 |
| 117 | 0.95  | 2 | 1333.7613      | 0.0315     | iTRAQ  | n[145.11]MFIVNTNVPR                                       | 0.66                    | IPI00293276 |
| 118 | 0.99  | 2 | 1522.7945      | 0.0261     | iTRAQ  | n[145.11]MGPPGLAGPPGESGR                                  | 0.93                    | IPI00297646 |
| 119 | 0.98  | 3 | 1418.8919      | 0.0396     | iTRAQ  | n[145.11]MK[272.20]DSLVLGR                                | 1.07                    | IPI00008791 |
| 120 | 0.95  | 3 | 1628.9291      | 0.0704     | iTRAQ  | n[145.11]MK[272.20]FNPFVTSR                               | 0.50                    | IPI00007144 |
| 121 | 1.00  | 2 | 1654.9159      | 0.0213     | iTRAQ  | n[145.11]MQNPQIALAALQER                                   | 0.89                    | IPI00023860 |
| 122 | 0.95  | 2 | 1365.7073      | -0.0124    | iTRAQ  | n[145.11]MVNFTVDQIR                                       | 0.79                    | IPI00186290 |
| 123 | 0.99  | 3 | 1967.1637      | 0.0553     | iTRAQ  | n[145.11]NEFSILK[272.20]SPGSVVFR                          | 0.87                    | IPI00168884 |
| 124 | 0.99  | 2 | 1642.87        | -0.01      | iTRAQ  | n[145.11]PFLELDTNLPANR                                    | 0.85                    | IPI00293867 |
| 125 | 0.98  | 3 | 1787.0728      | 0.043      | iTRAQ  | n[145.11]PSK[272.20]GPLQSVQVFR                            | 0.96                    | IPI00221092 |
| 126 | 0.98  | 3 | 2302.1244      | -0.0488    | iTRAQ  | n[145.11]QK[272.20]IC[160.03]DQWDALGSLTHSR                | 0.80                    | IPI00013808 |
| 127 | 0.96  | 2 | 1253.603       | -0.0092    | iTRAQ  | n[145.11]SEGGFTATGQR                                      | 0.79                    | IPI00003351 |



| #   | Prob. | z | Precursor Mass | Error [Da] | N-term | Peptide                                                               | iTRAQ 114/<br>iTRAQ 115 | IPI #       |
|-----|-------|---|----------------|------------|--------|-----------------------------------------------------------------------|-------------------------|-------------|
| 128 | 0.93  | 1 | 1297.2918      | -0.3539    | iTRAQ  | n[145.11]SEMYLEGLGR                                                   | 0.88                    | IPI00026580 |
| 129 | 0.94  | 2 | 1291.6674      | -0.0009    | iTRAQ  | n[145.11]SFYTYLQQR                                                    | 1.13                    | IPI00003590 |
| 130 | 0.99  | 2 | 1502.8165      | 0.0354     | iTRAQ  | n[145.11]SGAQASSTPLSPTR                                               | 0.89                    | IPI00021405 |
| 131 | 0.86  | 3 | 1787.9833      | 0.0827     | iTRAQ  | n[145.11]SGEPGK[272.20]QGPGSASGER                                     | 0.80                    | IPI00297646 |
| 132 | 1.00  | 3 | 2018.1376      | 0.0219     | iTRAQ  | n[145.11]SGISGPPGPPGAGK[272.20]EGLR                                   | 0.93                    | IPI00304962 |
| 133 | 0.98  | 3 | 1527.8511      | 0.0262     | iTRAQ  | n[145.11]SGPAGEVVGK[272.20]PGER                                       | 1.09                    | IPI00304962 |
| 134 | 0.93  | 2 | 1509.7438      | -0.0049    | iTRAQ  | n[145.11]SGPQFWVFQDR                                                  | 7.70                    | IPI00014758 |
| 135 | 0.86  | 2 | 1099.5612      | -0.0132    | iTRAQ  | n[145.11]SGPSGLPGER                                                   | 1.02                    | IPI00304962 |
| 136 | 0.99  | 2 | 1264.7029      | 0.0019     | iTRAQ  | n[145.11]SGPVGPAVAVGPR                                                | 0.98                    | IPI00304962 |
| 137 | 1.00  | 3 | 1962.9659      | 0.0254     | iTRAQ  | n[145.11]SGTLGHPGSLDETTYER                                            | 0.82                    | IPI00217745 |
| 138 | 0.88  | 3 | 1358.8339      | 0.0212     | iTRAQ  | n[145.11]SK[272.20]PDLTAALR                                           | 0.99                    | IPI00418471 |
| 139 | 0.86  | 2 | 1415.7593      | -0.005     | iTRAQ  | n[145.11]SLGAWNLENLR                                                  | 0.75                    | IPI00010800 |
| 140 | 0.96  | 2 | 1306.6816      | 0.0065     | iTRAQ  | n[145.11]SLGSQYQQR                                                    | 0.54                    | IPI00002802 |
| 141 | 0.99  | 2 | 1463.7542      | 0.0131     | iTRAQ  | n[145.11]SLNLEELSEMR                                                  | 0.83                    | IPI00186581 |
| 142 | 0.99  | 2 | 1489.7323      | 0.0193     | iTRAQ  | n[145.11]SLQEQADAAEER                                                 | 0.75                    | IPI00216134 |
| 143 | 0.99  | 2 | 1433.7232      | -0.0152    | iTRAQ  | n[145.11]SNTTAIAEAWAR                                                 | 0.99                    | IPI00007750 |
| 144 | 0.99  | 2 | 2184.9829      | 0.0692     | iTRAQ  | n[145.11]SQQTNDYMQPEEDWDR                                             | 0.83                    | IPI00013508 |
| 145 | 0.97  | 2 | 1085.6274      | -0.0041    | iTRAQ  | n[145.11]SSAGLGPVVR                                                   | 0.97                    | IPI00018305 |
| 146 | 0.98  | 2 | 1252.623       | 0.006      | iTRAQ  | n[145.11]SSSGPFTDVR                                                   | 0.95                    | IPI00022418 |
| 147 | 1.00  | 3 | 3158.5171      | 0.0904     | iTRAQ  | n[145.11]SSSDTC[160.03]GPC[160.03]EPASC[160.03]PPLPPLGC[160.03]LLGETR | 0.81                    | IPI00016915 |
| 148 | 1.00  | 3 | 2796.4982      | 0.0595     | iTRAQ  | n[145.11]SSSSLEK[272.20]SYELPDGQVITIGNER                              | 1.26                    | IPI00008603 |
| 149 | 0.92  | 2 | 1146.5985      | -0.013     | iTRAQ  | n[145.11]STAAQQLR                                                     | 0.72                    | IPI00019502 |
| 150 | 0.99  | 2 | 1696.9111      | 0.0422     | iTRAQ  | n[145.11]STGGISVPGPMGPGSMPR                                           | 0.97                    | IPI00297646 |
| 151 | 0.99  | 2 | 1285.6375      | -0.005     | iTRAQ  | n[145.11]SVSFADDFVR                                                   | 0.20                    | IPI00032140 |
| 152 | 0.98  | 2 | 1589.8447      | 0.0276     | iTRAQ  | n[145.11]SVSVVPPWDDSLR                                                | 0.89                    | IPI00010800 |
| 153 | 0.92  | 2 | 1092.5848      | 0.0131     | iTRAQ  | n[145.11]SVVDLTC[160.03]R                                             | 0.91                    | IPI00022430 |
| 154 | 0.99  | 2 | 1212.6342      | -0.0031    | iTRAQ  | n[145.11]SWDLPAAPGR                                                   | 0.96                    | IPI00006166 |
| 155 | 0.99  | 2 | 1360.6724      | -0.0207    | iTRAQ  | n[145.11]SYGGMLSAYLR                                                  | 0.94                    | IPI00296141 |
| 156 | 0.94  | 2 | 1221.5928      | 0.018      | iTRAQ  | n[145.11]SYSPEPDQR                                                    | 0.99                    | IPI00298237 |
| 157 | 0.92  | 2 | 1168.6711      | 0.0025     | iTRAQ  | n[145.11]TAPAAGVVPSR                                                  | 0.91                    | IPI00220113 |
| 158 | 0.97  | 3 | 3156.3986      | 0.0083     | iTRAQ  | n[145.11]TC[160.03]GQGYQLSAAK[272.20]DQC[160.03]EDIDEC[160.03]QHR     | 1.16                    | IPI00220249 |
| 159 | 0.94  | 3 | 1307.7296      | 0.0185     | iTRAQ  | n[145.11]TDAAVEMK[272.20]R                                            | 0.73                    | IPI00003406 |
| 160 | 0.99  | 2 | 1540.7416      | 0.0176     | iTRAQ  | n[145.11]TDATNPPEGPQDR                                                | 0.88                    | IPI00008780 |
| 161 | 0.96  | 3 | 1886.0138      | 0.0504     | iTRAQ  | n[145.11]TFNSIMK[272.20]C[160.03]DVDIR                                | 1.21                    | IPI00003269 |
| 162 | 1.00  | 3 | 1612.8073      | 0.0506     | iTRAQ  | n[145.11]THEAEQNDSVSPR                                                | 1.07                    | IPI00005564 |
| 163 | 1.00  | 3 | 1710.8841      | 0.0142     | iTRAQ  | n[145.11]THPEFAIEEELPR                                                | 1.08                    | IPI00012490 |
| 164 | 0.98  | 3 | 1897.1102      | 0.0767     | iTRAQ  | n[145.11]TK[272.20]PPQC[160.03]VDIPADLR                               | 0.62                    | IPI00749245 |
| 165 | 1.00  | 3 | 2702.1942      | 0.0046     | iTRAQ  | n[145.11]TLEHSDC[160.03]AFMVDNEAIYDIC[160.03]R                        | 0.98                    | IPI00007750 |
| 166 | 0.99  | 2 | 1358.8074      | 0.0247     | iTRAQ  | n[145.11]TLMNLGGLAVAR                                                 | 0.85                    | IPI00550363 |
| 167 | 0.96  | 2 | 1363.6908      | -0.0231    | iTRAQ  | n[145.11]TLSMIEEIR                                                    | 0.80                    | IPI00032064 |
| 168 | 0.95  | 2 | 1178.596       | 0.0059     | iTRAQ  | n[145.11]TLTSEEEAR                                                    | 1.21                    | IPI00217966 |
| 169 | 0.90  | 3 | 1875.0581      | 0.064      | iTRAQ  | n[145.11]TNEK[272.20]VELQELNDR                                        | 0.71                    | IPI00418471 |
| 170 | 0.88  | 2 | 1260.5919      | 0.0029     | iTRAQ  | n[145.11]TPAPETC[160.03]EGR                                           | 0.96                    | IPI00030241 |
| 171 | 0.99  | 2 | 1796.8882      | 0.043      | iTRAQ  | n[145.11]TTFNIQDGPDPQDR                                               | 0.79                    | IPI00017799 |

| #   | Prob. | z | Precursor Mass | Error [Da] | N-term    | Peptide                                            | iTRAQ 114/<br>iTRAQ 115 | IPI #       |
|-----|-------|---|----------------|------------|-----------|----------------------------------------------------|-------------------------|-------------|
| 172 | 1.00  | 3 | 2236.2643      | -0.0028    | iTRAQ     | n[145.11]TTIAGVVYK[272.20]DGIVLGADTR               | 0.92                    | IPI00003217 |
| 173 | 0.97  | 2 | 1544.7922      | 0.0329     | iTRAQ     | n[145.11]TWELEPDGALDR                              | 1.11                    | IPI00002714 |
| 174 | 0.96  | 2 | 1483.8027      | 0.0234     | iTRAQ     | n[145.11]VDYEEVLGVQR                               | 0.79                    | IPI00024523 |
| 175 | 1.00  | 2 | 1402.6642      | -0.0031    | iTRAQ     | n[145.11]VGFYESDVMGR                               | 1.01                    | IPI00478003 |
| 176 | 0.99  | 3 | 1251.6548      | 0.0106     | iTRAQ     | n[145.11]VGGAEHTAHR                                | 0.26                    | IPI00029236 |
| 177 | 0.99  | 2 | 1619.863       | 0.032      | iTRAQ     | n[145.11]VGSLELSEMR                                | 0.76                    | IPI00186581 |
| 178 | 0.87  | 3 | 1680.0056      | 0.0609     | iTRAQ     | n[145.11]VIFSK[272.20]VDVNTDR                      | 1.15                    | IPI00009794 |
| 179 | 0.93  | 3 | 1319.8419      | 0.0502     | iTRAQ     | n[145.11]VK[272.20]VGVNGFGR                        | 6.04                    | IPI00219018 |
| 180 | 0.93  | 2 | 1307.7346      | 0.0139     | iTRAQ     | n[145.11]VLAELYVSDR                                | 0.85                    | IPI00306960 |
| 181 | 0.91  | 2 | 1378.7448      | 0.0121     | iTRAQ     | n[145.11]VLPGPPEPGGQR                              | 1.04                    | IPI00010800 |
| 182 | 0.98  | 2 | 1512.7651      | 0.0174     | iTRAQ     | n[145.11]VPTQC[160.03]DVPPNSR                      | 0.91                    | IPI00293088 |
| 183 | 0.90  | 2 | 1130.6882      | 0.0101     | iTRAQ     | n[145.11]VSAVLTELR                                 | 0.88                    | IPI00008079 |
| 184 | 0.97  | 3 | 1457.9246      | 0.0437     | iTRAQ     | n[145.11]VSK[272.20]PDLTAALR                       | 0.79                    | IPI00418471 |
| 185 | 0.94  | 2 | 1288.7261      | 0          | iTRAQ     | n[145.11]VSLGVDWLTR                                | 32.29                   | IPI00014758 |
| 186 | 0.99  | 3 | 1594.9231      | 0.0196     | iTRAQ     | n[145.11]VSPAAGSSPGK[272.20]PPR                    | 0.92                    | IPI00032293 |
| 187 | 0.98  | 2 | 1316.6818      | -0.0029    | iTRAQ     | n[145.11]VSPVWDDSLR                                | 1.19                    | IPI00010800 |
| 188 | 0.83  | 2 | 998.5886       | -0.0109    | iTRAQ     | n[145.11]VVNGIPTR                                  | 0.92                    | IPI00025767 |
| 189 | 1.00  | 2 | 1099.506       | -0.003     | iTRAQ     | n[145.11]YESDVMGR                                  | 7.27                    | IPI00478003 |
| 190 | 0.85  | 2 | 1209.6291      | 0.0027     | iTRAQ     | n[145.11]YNPEPPPPR                                 | 0.89                    | IPI00025084 |
| 191 | 0.98  | 3 | 1681.9316      | 0.0648     | iTRAQ     | n[145.11]YQGVPVGDVDPK[272.20]YR                    | 3.89                    | IPI00014758 |
| 192 | 0.94  | 2 | 1285.6634      | 0.0209     | iTRAQ     | n[145.11]YVDDTQFVR                                 | 0.79                    | IPI00004657 |
| 193 | 1.00  | 3 | 1439.7875      | 0.0258     | iTRAQ     | n[145.11]YVGDEAQS[272.20]R                         | 1.04                    | IPI00003269 |
| 194 | 0.91  | 2 | 1199.6888      | -0.0107    | Ac-lysine | n[43.02]AAVDLEK[272.20]LR                          | 0.98                    | IPI00332371 |
| 195 | 0.96  | 3 | 1797.1451      | 0.0735     | Ac-lysine | n[43.02]AAVK[272.20]TLNPK[272.20]AEVAR             | 0.95                    | IPI00027626 |
| 196 | 0.84  | 2 | 1356.7685      | 0.0202     | Ac-lysine | n[43.02]ADEIAK[272.20]AQVAR                        | 0.83                    | IPI00239077 |
| 197 | 1.00  | 2 | 1845.9534      | 0.0457     | Ac-lysine | n[43.02]ADLEEQLSDEEK[272.20]VR                     | 0.91                    | IPI00026182 |
| 198 | 0.94  | 2 | 1387.6716      | -0.0097    | Ac-lysine | n[43.02]ADNEK[272.20]LDNQR                         | 0.89                    | IPI00012578 |
| 199 | 0.93  | 3 | 1418.8498      | 0.0261     | Ac-lysine | n[43.02]AK[272.20]PAQGAK[272.20]YR                 | 0.99                    | IPI00002459 |
| 200 | 0.95  | 3 | 1473.8579      | 0.0185     | Ac-lysine | n[43.02]AK[272.20]PLTDSEK[272.20]R                 | 0.90                    | IPI00004358 |
| 201 | 0.91  | 2 | 1326.7396      | -0.0231    | Ac-lysine | n[43.02]ALETVPK[272.20]DLR                         | 0.57                    | IPI00002895 |
| 202 | 0.98  | 2 | 1185.6521      | -0.0066    | Ac-lysine | n[43.02]ANNDVVLK[272.20]R                          | 0.88                    | IPI00006252 |
| 203 | 0.97  | 2 | 1587.7607      | 0.0174     | Ac-lysine | n[43.02]AQDQGEK[272.20]ENPMR                       | 0.96                    | IPI00376798 |
| 204 | 0.97  | 3 | 2437.416       | 0.0917     | Ac-lysine | n[43.02]ASGVAVSDGVK[272.20]VFNDMK[272.20]VR        | 0.65                    | IPI00012011 |
| 205 | 0.98  | 2 | 1755.8475      | 0.0368     | Ac-lysine | n[43.02]ASK[272.20]EMFEDTVEER                      | 0.92                    | IPI00395865 |
| 206 | 0.93  | 3 | 1970.0772      | 0.0106     | Ac-lysine | n[43.02]ASQSQGIQQLQAQEK[272.20]R                   | 1.79                    | IPI00025285 |
| 207 | 0.99  | 2 | 1571.9306      | 0.0301     | Ac-lysine | n[43.02]ATVTATTK[272.20]VPEIR                      | 0.87                    | IPI00009104 |
| 208 | 0.85  | 2 | 1499.7991      | 0.0249     | Ac-lysine | n[43.02]AVTLDK[272.20]DAYYR                        | 1.15                    | IPI00026970 |
| 209 | 0.99  | 3 | 1848.0082      | 0.0219     | Ac-lysine | n[43.02]GDAPSPEEK[272.20]LHLITR                    | 1.08                    | IPI00007074 |
| 210 | 1.00  | 2 | 1672.9275      | 0.0335     | Ac-lysine | n[43.02]MDGIVPDIAVGTK[272.20]R                     | 1.02                    | IPI00179964 |
| 211 | 0.89  | 3 | 1429.7488      | 0.0199     | Ac        | n[43.02]MDIAIHHPWIR                                | na                      | IPI00021369 |
| 212 | 0.98  | 4 | 2605.5822      | 0.1348     | Ac-lysine | n[43.02]MEK[272.20]TELIQK[272.20]AK[272.20]LAEQAER | 1.04                    | IPI00018146 |
| 213 | 0.99  | 2 | 1427.6909      | -0.008     | Ac-lysine | n[43.02]MFSWVSK[272.20]DAR                         | 1.26                    | IPI00017184 |
| 214 | 0.98  | 3 | 2144.1194      | 0.0782     | Ac-lysine | n[43.02]MGQK[272.20]DSYVGDEAQS[272.20]R            | 0.69                    | IPI00008603 |
| 215 | 0.99  | 2 | 1773.9461      | -0.0108    | Ac-lysine | n[43.02]MLGPEGGEGFVVK[272.20]LR                    | 1.05                    | IPI00003881 |

| #   | Prob. | z | Precursor Mass | Error [Da] | N-term    | Peptide                        | iTRAQ 114/<br>iTRAQ 115 | IPI #       |
|-----|-------|---|----------------|------------|-----------|--------------------------------|-------------------------|-------------|
| 216 | 1.00  | 3 | 2003.9775      | 0.0041     | Ac        | n[43.02]MNVDHEVNLLVEEIH        | na                      | IPI00514113 |
| 217 | 0.98  | 2 | 1553.7462      | 0.0044     | Ac-lysine | n[43.02]MQPASAK[272.20]WYDR    | 0.78                    | IPI00015029 |
| 218 | 0.97  | 2 | 1633.8715      | 0.021      | Ac-lysine | n[43.02]SSK[272.20]TASTNNIAQAR | 0.95                    | IPI00221232 |
| 219 | 0.92  | 2 | 1709.9083      | 0.0377     | Ac-lysine | n[43.02]TTTTTFK[272.20]GVDPNSR | 0.66                    | IPI00007764 |

**SUPPLEMENTARY TABLE III****Proteomic iTRAQ-TAILS analysis of sMT6-MMP cleaved fibroblast secretome**

The Exp2 data set, including 31 unique peptides used for normalization having a standard deviation of 0.60.

| #  | Prob | z | Precursor Mass | Error [Da] | N-term | Peptide                                               | iTRAQ 114/<br>iTRAQ 115 | IPI #       |
|----|------|---|----------------|------------|--------|-------------------------------------------------------|-------------------------|-------------|
| 1  | 1.00 | 3 | 1919.935       | -0.0563    | iTRAQ  | n[145.11]AAAGGPGVSGVC[160.03]VC[160.03]K[272.20]SR    | 24.8                    | IPI00016915 |
| 2  | 0.94 | 3 | 2220.5196      | 0.3119     | iTRAQ  | n[145.11]AEK[272.20]K[272.20]ATDAEADVASLNR            | 13.51                   | IPI00013991 |
| 3  | 0.90 | 3 | 2020.2764      | 0.2217     | iTRAQ  | n[145.11]AEQAEADK[272.20]K[272.20]QAEDR               | 32.23                   | IPI00013991 |
| 4  | 0.93 | 2 | 970.428        | -0.0677    | iTRAQ  | n[145.11]AGPPGESGR                                    | 32.96                   | IPI00297646 |
| 5  | 0.99 | 2 | 1023.5295      | -0.0652    | iTRAQ  | n[145.11]AGPVGVPVGAR                                  | 0.28                    | IPI00297646 |
| 6  | 0.93 | 3 | 1428.7246      | -0.0321    | iTRAQ  | n[145.11]AK[272.20]HIAEDSDR                           | 17.96                   | IPI00013991 |
| 7  | 0.83 | 3 | 1426.7439      | -0.0328    | iTRAQ  | n[145.11]AK[272.20]HIAEEADR                           | 15.19                   | IPI00010779 |
| 8  | 1.00 | 2 | 2103.0622      | -0.0715    | iTRAQ  | n[145.11]ALYSPSDPLTLLQADTVR                           | 40                      | IPI00003590 |
| 9  | 0.99 | 2 | 1219.566       | -0.0692    | iTRAQ  | n[145.11]AMGALELESR                                   | 32.531                  | IPI00003590 |
| 10 | 0.99 | 3 | 1777.9083      | -0.0594    | iTRAQ  | n[145.11]APGAPGVPGPAGK[272.20]SGDR                    | 9.81                    | IPI00297646 |
| 11 | 0.98 | 2 | 1118.5129      | -0.056     | iTRAQ  | n[145.11]ASVEEEGVR                                    | 24.17                   | IPI00032293 |
| 12 | 0.97 | 3 | 2007.9143      | -0.0996    | iTRAQ  | n[145.11]C[160.03]EVDALK[272.20]GTNESLER              | 0.48                    | IPI00418471 |
| 13 | 0.83 | 3 | 2488.0126      | -0.1401    | iTRAQ  | n[145.11]C[160.03]SC[160.03]SPVHPQQAFC[160.03]NADVIVR | 0.83                    | IPI00027166 |
| 14 | 0.88 | 2 | 887.3977       | -0.0493    | iTRAQ  | n[145.11]DEEVPR                                       | 0.75                    | IPI00023283 |
| 15 | 0.96 | 2 | 1397.556       | -0.045     | iTRAQ  | n[145.11]DFGYDGDYR                                    | 8.47                    | IPI00304962 |
| 16 | 0.99 | 2 | 1284.6056      | -0.0741    | iTRAQ  | n[145.11]DIAVDGEPLGR                                  | 6.1                     | IPI00419585 |
| 17 | 0.86 | 2 | 1135.5162      | -0.0582    | iTRAQ  | n[145.11]DIGPYQSGR                                    | 0.74                    | IPI00749245 |
| 18 | 0.97 | 2 | 1792.8884      | -0.0713    | iTRAQ  | n[145.11]DWVIPPINLPENSR                               | 0.92                    | IPI00290085 |
| 19 | 0.94 | 2 | 1882.7145      | -0.1982    | iTRAQ  | n[145.11]EC[160.03]K[272.20]TGYDFDGISR                | 1.1                     | IPI00218803 |
| 20 | 0.94 | 2 | 986.4581       | -0.0574    | iTRAQ  | n[145.11]EDDIPVR                                      | 1.37                    | IPI00032258 |
| 21 | 0.95 | 2 | 1316.5719      | -0.0909    | iTRAQ  | n[145.11]EQAPMAGALNR                                  | 1.02                    | IPI00396078 |
| 22 | 0.95 | 2 | 1421.5947      | -0.0597    | iTRAQ  | n[145.11]EQEDPYLNDNR                                  | 28.6                    | IPI00218803 |
| 23 | 1.00 | 2 | 1346.6575      | -0.0852    | iTRAQ  | n[145.11]FAAATGATPIAGR                                | 3.35                    | IPI00398958 |
| 24 | 0.98 | 2 | 1236.5628      | -0.0592    | iTRAQ  | n[145.11]FADLSEANR                                    | 6.84                    | IPI00418471 |
| 25 | 0.96 | 3 | 1412.7483      | -0.0534    | iTRAQ  | n[145.11]FANYIDK[272.20]VR                            | 27.7                    | IPI00418471 |
| 26 | 0.99 | 2 | 1431.6792      | -0.0685    | iTRAQ  | n[145.11]FDIAVDGEPLGR                                 | 6.6                     | IPI00419585 |
| 27 | 0.97 | 2 | 1282.5166      | -0.0571    | iTRAQ  | n[145.11]FGYDGDYR                                     | 11.53                   | IPI00304962 |
| 28 | 0.89 | 2 | 1336.7201      | -0.0788    | iTRAQ  | n[145.11]FIPPAPVLPDR                                  | 19.96                   | IPI00305975 |
| 29 | 0.90 | 2 | 1198.595       | -0.0631    | iTRAQ  | n[145.11]FPGLPGSPGAR                                  | 16                      | IPI00306322 |
| 30 | 0.95 | 3 | 1507.7211      | -0.0806    | iTRAQ  | n[145.11]FPLENAPIGHNR                                 | 16.31                   | IPI00015913 |
| 31 | 0.87 | 2 | 1126.4918      | -0.0611    | iTRAQ  | n[145.11]FQAPSDYR                                     | 7.35                    | IPI00023673 |
| 32 | 0.99 | 3 | 2023.9223      | -0.0614    | iTRAQ  | n[145.11]FQGPAGEPGEPTGPAGAR                           | 13.89                   | IPI00304962 |
| 33 | 0.97 | 3 | 1812.2126      | 0.1879     | iTRAQ  | n[145.11]FTVGPLGEGGAHK[272.20]VR                      | 3.31                    | IPI00178352 |
| 34 | 0.98 | 2 | 1586.7445      | -0.044     | iTRAQ  | n[145.11]FVSSSLPDIC[160.03]YR                         | 38.94                   | IPI00430812 |
| 35 | 0.94 | 2 | 1345.6667      | -0.06      | iTRAQ  | n[145.11]FWEGLPAQVR                                   | 18.29                   | IPI00014758 |
| 36 | 0.99 | 3 | 1976.962       | -0.0508    | iTRAQ  | n[145.11]GAAAGGPGVSGVC[160.03]VC[160.03]K[272.20]SR   | 5.2                     | IPI00016915 |
| 37 | 0.95 | 3 | 1609.8187      | -0.0593    | iTRAQ  | n[145.11]GAPGVPGPAGK[272.20]SGDR                      | 9.5                     | IPI00297646 |
| 38 | 1.00 | 2 | 1104.5172      | -0.0625    | iTRAQ  | n[145.11]GATGFPGAAGR                                  | 6.65                    | IPI00186460 |
| 39 | 0.90 | 2 | 1074.4551      | -0.0696    | iTRAQ  | n[145.11]GDPGLMGER                                    | 6.05                    | IPI00291136 |

| #  | Prob | z | Precursor Mass | Error [Da] | N-term | Peptide                                                    | iTRAQ 114/<br>iTRAQ 115 | IPI #       |
|----|------|---|----------------|------------|--------|------------------------------------------------------------|-------------------------|-------------|
| 40 | 1.00 | 2 | 1235.4923      | -0.0614    | iTRAQ  | n[145.11]GGFDEDAEPR                                        | 6.15                    | IPI00009794 |
| 41 | 1.00 | 2 | 1575.6616      | -0.0705    | iTRAQ  | n[145.11]GGPMDASVEEEGVR                                    | 5.79                    | IPI00032293 |
| 42 | 0.98 | 3 | 1792.8147      | -0.069     | iTRAQ  | n[145.11]GK[272.20]DLGGFDEDAEPR                            | 9.5                     | IPI00009794 |
| 43 | 0.88 | 3 | 1648.9633      | -0.0474    | iTRAQ  | n[145.11]GK[272.20]VK[272.20]VGVNGFGR                      | 0.82                    | IPI00219018 |
| 44 | 0.99 | 2 | 1140.5409      | -0.06      | iTRAQ  | n[145.11]GLAGPPGESGR                                       | 8.5                     | IPI00297646 |
| 45 | 0.97 | 2 | 1272.6347      | -0.071     | iTRAQ  | n[145.11]GLQGFPGLQGR                                       | 5.3                     | IPI00306322 |
| 46 | 0.99 | 2 | 1164.5269      | -0.0558    | iTRAQ  | n[145.11]GMTGFPGAAGR                                       | 6.15                    | IPI00304962 |
| 47 | 0.98 | 2 | 1748.7819      | -0.0748    | iTRAQ  | n[145.11]GPAGEPGEPGQTGPAGAR                                | 11.49                   | IPI00304962 |
| 48 | 0.89 | 2 | 954.4344       | -0.0661    | iTRAQ  | n[145.11]GPAGPAGER                                         | 33.88                   | IPI00186460 |
| 49 | 0.98 | 3 | 2073.9656      | -0.0701    | iTRAQ  | n[145.11]GPAGTPGQIDC[160.03]DITDVK[272.20]R                | 24.96                   | IPI00306322 |
| 50 | 0.99 | 2 | 1325.5847      | -0.0673    | iTRAQ  | n[145.11]GPPGDPGLMGER                                      | 13.05                   | IPI00291136 |
| 51 | 0.85 | 3 | 1422.7701      | -0.0486    | iTRAQ  | n[145.11]GPPGPAGK[272.20]EGLR                              | 18.04                   | IPI00304962 |
| 52 | 0.90 | 3 | 1454.9361      | 0.1644     | iTRAQ  | n[145.11]GPPGPSGEEGK[272.20]R                              | 37.89                   | IPI00304962 |
| 53 | 0.99 | 3 | 1941.9281      | -0.0467    | iTRAQ  | n[145.11]GPSGEPGK[272.20]QGSPGASGER                        | 24.57                   | IPI00297646 |
| 54 | 1.00 | 3 | 1681.8306      | -0.0685    | iTRAQ  | n[145.11]GPSGPAAGEVGK[272.20]PGER                          | 34.06                   | IPI00304962 |
| 55 | 0.99 | 2 | 1127.5604      | -0.0563    | iTRAQ  | n[145.11]GPVGAAGATGAR                                      | 15.6                    | IPI00304962 |
| 56 | 0.96 | 3 | 1433.9651      | 0.1554     | iTRAQ  | n[145.11]GPVGPAGK[272.20]HGMR                              | 18.98                   | IPI00304962 |
| 57 | 0.99 | 2 | 1135.4562      | -0.0495    | iTRAQ  | n[145.11]GYDGDYR                                           | 23.02                   | IPI00304962 |
| 58 | 0.99 | 2 | 1358.6798      | -0.0729    | iTRAQ  | n[145.11]IETLLTPEGSR                                       | 32.81                   | IPI00304962 |
| 59 | 0.96 | 3 | 1323.7747      | -0.073     | iTRAQ  | n[145.11]IK[272.20]IIAPPER                                 | 1.31                    | IPI00003269 |
| 60 | 0.99 | 2 | 1243.6279      | -0.1091    | iTRAQ  | n[145.11]ISSVLQANLR                                        | 40                      | IPI00023208 |
| 61 | 0.82 | 2 | 1657.7677      | -0.076     | iTRAQ  | n[145.11]ITWELEPDGALDR                                     | 40                      | IPI00002714 |
| 62 | 0.98 | 2 | 1083.5204      | -0.0591    | iTRAQ  | n[145.11]LAGPPGESGR                                        | 28.01                   | IPI00297646 |
| 63 | 0.99 | 4 | 2709.7163      | 0.2977     | iTRAQ  | n[145.11]LGAEAK[272.20]TFDQLTPEESK[272.20]ER               | 8.16                    | IPI00014537 |
| 64 | 0.86 | 3 | 2072.3019      | 0.2192     | iTRAQ  | n[145.11]LGK[272.20]DSNNLC[160.03]LHFNPR                   | 2.49                    | IPI00219219 |
| 65 | 0.92 | 2 | 1015.5237      | -0.0547    | iTRAQ  | n[145.11]LLTPEGSR                                          | 17.09                   | IPI00304962 |
| 66 | 0.99 | 2 | 1827.9168      | -0.0649    | iTRAQ  | n[145.11]LNNQIETLLTPEGSR                                   | 30.37                   | IPI00304962 |
| 67 | 0.84 | 3 | 2467.5464      | 0.2687     | iTRAQ  | n[145.11]LTETDIC[160.03]K[272.20]LPK[272.20]DEGTC[160.03]R | 2.29                    | IPI00022200 |
| 68 | 1.00 | 2 | 1299.6662      | -0.0855    | iTRAQ  | n[145.11]LVIIEGDLR                                         | 5.3                     | IPI00183968 |
| 69 | 0.99 | 2 | 1164.5323      | -0.0607    | iTRAQ  | n[145.11]MGALELESR                                         | 25.31                   | IPI00003590 |
| 70 | 0.99 | 2 | 1348.5347      | -0.0492    | iTRAQ  | n[145.11]MQPEEDWDR                                         | 19.02                   | IPI00013508 |
| 71 | 1.00 | 2 | 1714.8315      | -0.0652    | iTRAQ  | n[145.11]NNQIETLLTPEGSR                                    | 20.12                   | IPI00304962 |
| 72 | 1.00 | 2 | 1600.7863      | -0.0684    | iTRAQ  | n[145.11]NQIETLLTPEGSR                                     | 16.13                   | IPI00304962 |
| 73 | 0.97 | 3 | 1476.698       | -0.0827    | iTRAQ  | n[145.11]PGPDGPAASGPAAIR                                   | 1.27                    | IPI00292020 |
| 74 | 0.86 | 3 | 1819.9496      | -0.0261    | iTRAQ  | n[145.11]QAEADK[272.20]K[272.20]QAEDR                      | 37.83                   | IPI00013991 |
| 75 | 0.94 | 3 | 2328.0706      | -0.0721    | iTRAQ  | n[145.11]SLAGSSGPGASSGSGDHGELVVR                           | 2                       | IPI00023048 |
| 76 | 1.00 | 2 | 1330.66        | -0.0727    | iTRAQ  | n[145.11]SLSQIENIR                                         | 5.07                    | IPI00297646 |
| 77 | 0.99 | 2 | 1581.7966      | -0.0518    | iTRAQ  | n[145.11]SPAGGPLEDVVIER                                    | 1.74                    | IPI00303300 |
| 78 | 0.99 | 3 | 1958.8951      | -0.0595    | iTRAQ  | n[145.11]SPSAPDAPTC[160.03]PK[272.20]QC[160.03]R           | 29.05                   | IPI00299738 |
| 79 | 0.99 | 2 | 1130.5557      | -0.0608    | iTRAQ  | n[145.11]SQIENIR                                           | 18.4                    | IPI00297646 |
| 80 | 0.98 | 2 | 1162.5577      | -0.0487    | iTRAQ  | n[145.11]SSAAGEGTLAR                                       | 4.15                    | IPI00292150 |
| 81 | 0.97 | 3 | 1526.9612      | 0.1675     | iTRAQ  | n[145.11]SYVGDEAQS[272.20]R                                | 16.74                   | IPI00008603 |
| 82 | 1.00 | 2 | 1627.7864      | -0.0673    | iTRAQ  | n[145.11]TEVIDPQDLLEGR                                     | 5.42                    | IPI00011564 |
| 83 | 0.94 | 3 | 1791.865       | -0.0379    | iTRAQ  | n[145.11]TPGQIDC[160.03]DITDVK[272.20]R                    | 4.5                     | IPI00306322 |

| #   | Prob | z | Precursor Mass | Error [Da] | N-term    | Peptide                                            | iTRAQ 114/<br>iTRAQ 115 | IPI #       |
|-----|------|---|----------------|------------|-----------|----------------------------------------------------|-------------------------|-------------|
| 84  | 1.00 | 2 | 1405.6748      | -0.0423    | iTRAQ     | n[145.11]TVITSVGDEEGR                              | 26.24                   | IPI00002714 |
| 85  | 0.82 | 3 | 1718.8745      | -0.0661    | iTRAQ     | n[145.11]VDALK[272.20]GTNESLER                     | 3.26                    | IPI00418471 |
| 86  | 1.00 | 3 | 1915.1906      | 0.1829     | iTRAQ     | n[145.11]VEELMEDTQHK[272.20]LR                     | 11.97                   | IPI00002714 |
| 87  | 0.99 | 2 | 1288.6684      | -0.0573    | iTRAQ     | n[145.11]VFASLPQVER                                | 5.3                     | IPI00216256 |
| 88  | 1.00 | 2 | 1333.5192      | -0.0676    | iTRAQ     | n[145.11]VGADDDEGGAER                              | 9.06                    | IPI00176903 |
| 89  | 1.00 | 2 | 1674.7394      | -0.0613    | iTRAQ     | n[145.11]VGGPMDASVEEEGVR                           | 20.4                    | IPI00032293 |
| 90  | 0.94 | 2 | 1397.6838      | -0.0798    | iTRAQ     | n[145.11]VIDPQDLLEGR                               | 5.8                     | IPI00011564 |
| 91  | 0.93 | 2 | 1186.6077      | -0.0602    | iTRAQ     | n[145.11]VIEGDLER                                  | 29.47                   | IPI00183968 |
| 92  | 0.91 | 2 | 1200.6052      | -0.0784    | iTRAQ     | n[145.11]VILEGELER                                 | 11.8                    | IPI00010779 |
| 93  | 0.83 | 3 | 2616.6384      | 0.3017     | iTRAQ     | n[145.11]VMVGMGQK[272.20]DSYVGDEAQS[272.20]R       | 20.28                   | IPI00008603 |
| 94  | 0.91 | 2 | 949.3849       | -0.0558    | iTRAQ     | n[145.11]VNDGDMR                                   | 1.09                    | IPI00023673 |
| 95  | 0.99 | 2 | 1917.7508      | -0.0779    | iTRAQ     | n[145.11]VSGGGYDFGYDGFYR                           | 29.62                   | IPI00304962 |
| 96  | 0.88 | 2 | 1078.4232      | -0.0605    | iTRAQ     | n[145.11]YDGFYR                                    | 21.57                   | IPI00304962 |
| 97  | 0.99 | 2 | 1352.6242      | -0.0455    | iTRAQ     | n[145.11]YVLDDSDGLGR                               | 0.72                    | IPI00008790 |
| 98  | 0.99 | 2 | 1330.4906      | -0.0631    | Ac        | n[43.02]AAGGDHGSPDSYR                              | na                      | IPI00026904 |
| 99  | 0.99 | 3 | 2156.999       | -0.1166    | Ac-lysine | n[43.02]AC[160.03]GLVASNLNLK[272.20]PGEC[160.03]LR | 1.04                    | IPI00219219 |
| 100 | 0.99 | 2 | 962.4041       | -0.0529    | Ac        | n[43.02]AEASPHPR                                   | na                      | IPI00155562 |
| 101 | 0.99 | 2 | 1094.4972      | -0.0649    | Ac        | n[43.02]AGLGHPAAFGR                                | na                      | IPI00220342 |
| 102 | 0.89 | 2 | 958.4089       | -0.0532    | Ac        | n[43.02]AGVSFSGHR                                  | na                      | IPI00003406 |
| 103 | 0.87 | 2 | 1217.395       | -0.231     | Ac        | n[43.02]AIITC[160.03]C[160.03]LLGR                 | na                      | IPI00639851 |
| 104 | 0.95 | 2 | 1403.6817      | -0.0561    | Ac-lysine | n[43.02]AK[272.20]ISSPTETER                        | 0.73                    | IPI00013895 |
| 105 | 0.97 | 2 | 1224.4793      | -0.069     | Ac        | n[43.02]ASGEHSPGSGAAR                              | na                      | IPI00647400 |
| 106 | 0.91 | 2 | 1387.6629      | -0.0548    | Ac-lysine | n[43.02]ASNVTNK[272.20]TDPR                        | 0.51                    | IPI00216592 |
| 107 | 0.92 | 2 | 905.3244       | -0.0457    | Ac        | n[43.02]MEEYHR                                     | na                      | IPI00020885 |
| 108 | 0.93 | 2 | 941.3861       | -0.097     | Ac        | n[43.02]RLFGDHR                                    | na                      | IPI00748682 |
| 109 | 1.00 | 2 | 1142.5035      | -0.0434    | Ac        | n[43.02]SAAEAGGVFHR                                | na                      | IPI00305010 |
| 110 | 0.94 | 3 | 1881.7533      | -0.0709    | Ac        | n[43.02]SGDHLHNSQIEADFR                            | na                      | IPI00413611 |
| 111 | 0.96 | 2 | 859.3476       | -0.046     | Ac        | n[43.02]SSAHFNR                                    | na                      | IPI00021264 |
| 112 | 0.97 | 2 | 1042.4289      | -0.0577    | Ac        | n[43.02]TMLADHAAR                                  | na                      | IPI00298961 |
